# Supplementary material for: Investigation of the antibacterial properties of hyaluronic acid microneedles based on chitosan and MoS2
Source: Royal Society of Chemistry journal article supplement (doi:10.1039/d3tb00755c), 2023-01-01
Supplement: d3tb00755c1.pdf [file d3tb00755c1.pdf]

## Supporting Information

### **Investigation of antibacterial properties of hyaluronic acid microneedles based on chitosan and MoS<sub>2</sub>**

Wenzhen Du,<sup>a</sup> Xiaodan Li,<sup>a</sup> Manyue Zhang,<sup>a</sup> Guixia Ling,<sup>a,\*</sup> Peng Zhang<sup>a,\*</sup>

<sup>a</sup> Wuya College of Innovation, Shenyang Pharmaceutical University, No. 103, Wenhua Road, Shenyang 110016, China.<sup>1</sup>

---

\* Corresponding author. zhangpengspu@163.com (Peng Zhang); pharlab@163.com (Guixia Ling).

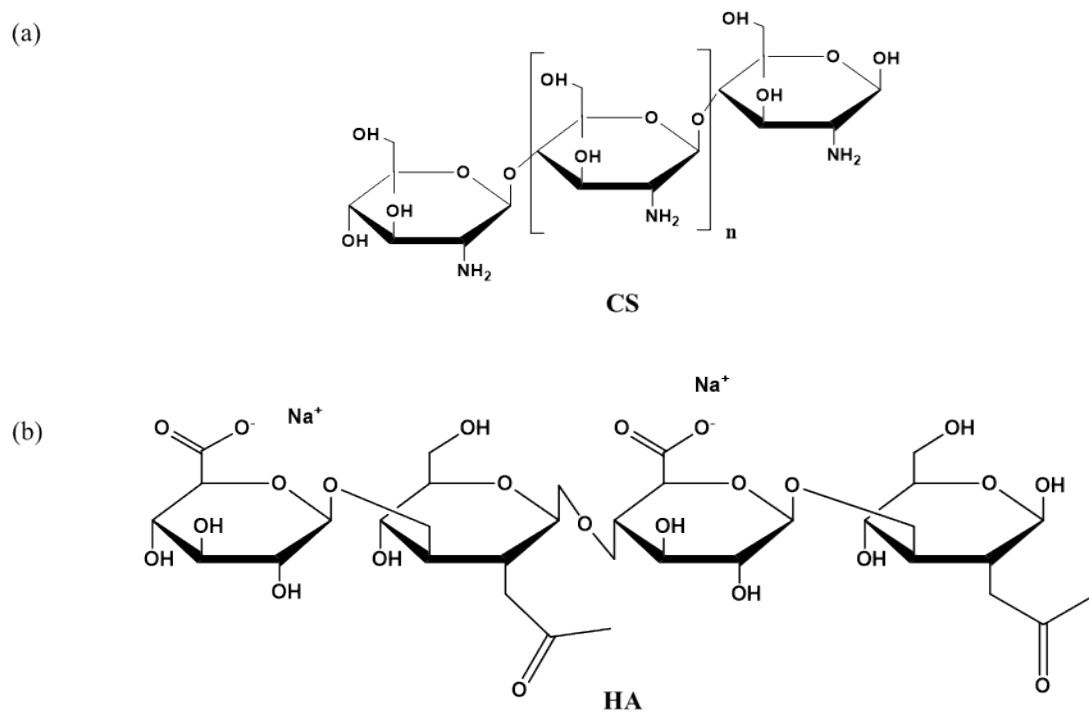

**Fig. S1.** The chemical structure of Chitosan (CS) (a) and Hyaluronic acid (HA) (b).

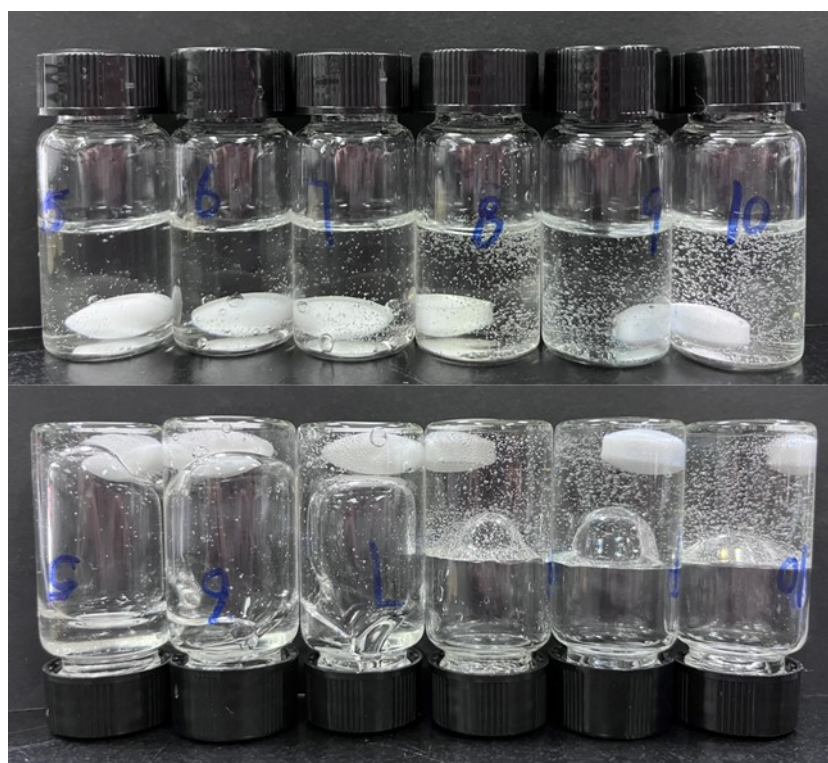

**Fig. S2.** Mobility comparison of different concentrations of HA (from left to right, the concentrations of HA are 5%-10% respectively).

| PVP \ HA(%) | 5 | 6 | 7 | 8 | 9 | 10 |
|-------------|---|---|---|---|---|----|
| 5           | - | - | ± | + | + | +  |
| 6           | - | - | - | ± | + | +  |
| 7           | \ | \ | \ | \ | ± | +  |
| 8           | \ | \ | \ | \ | \ | ±  |
| 9           | \ | \ | \ | \ | \ | \  |
| 10          | \ | \ | \ | \ | \ | \  |

**Fig. S3.** Brittleness screening of MN prescriptions. (- means the experimental group with greater brittleness; ± means the experimental group with a certain brittleness; + means the experimental group with less brittleness; \ means the experimental group was excluded during the experiment).

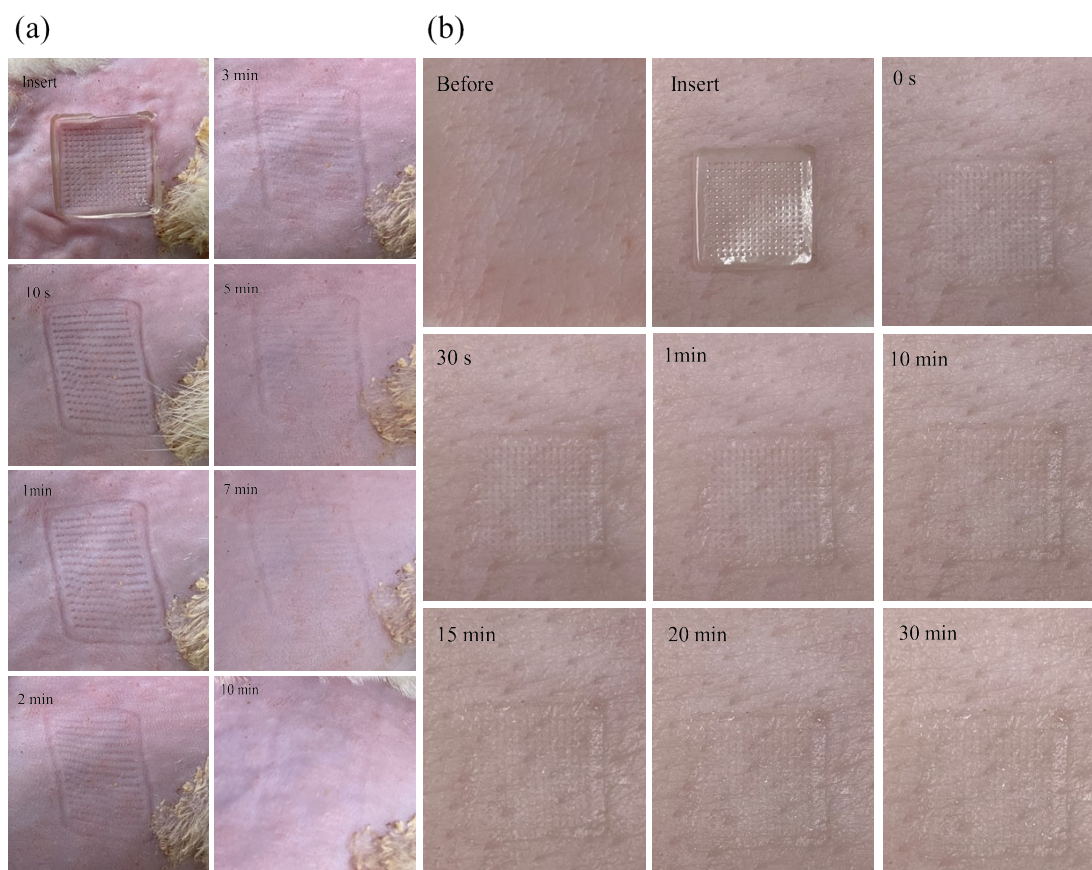

**Fig. S4.** Skin recovery of rats after MN insertion (a); skin recovery of isolated porcine skin after MN insertion (b).

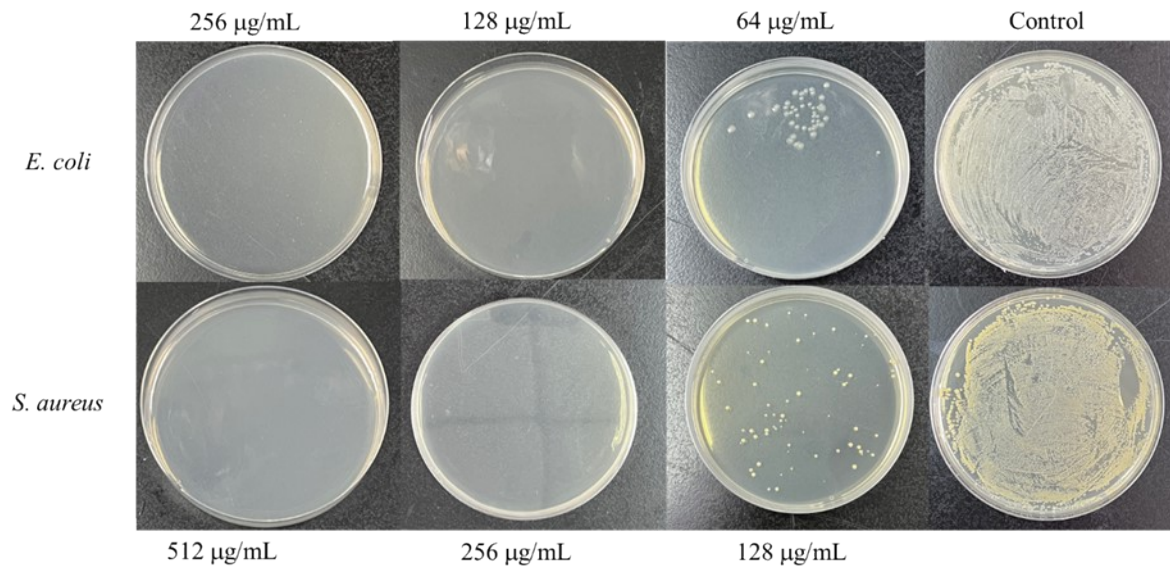

**Fig. S5.** Schematic diagram of MBC of *E. coli* and *S. aureus*.
